# Supplementary material for: Improvement of flatness and structural regularity of mesostructured silica films having strictly aligned two-dimensional hexagonal structure
Source: Royal Society of Chemistry journal article supplement (doi:10.1039/c3tc30385c), 2013-01-01
Supplement: c3tc30385c.pdf [file c3tc30385c.pdf]

## Supporting Information

(a)

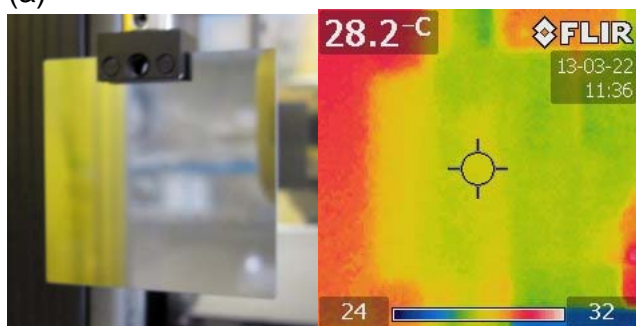

(b)

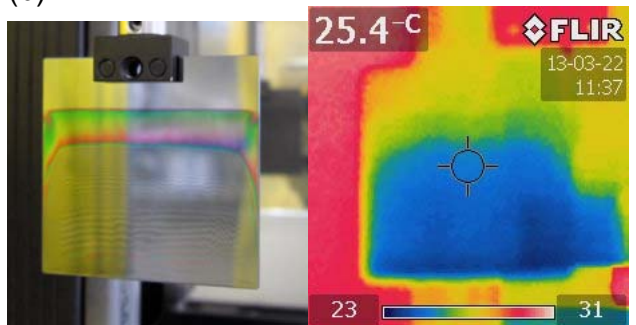

5 **Fig. S1** Photograph (left) and IR thermometer image (right) of (a) bare Si substrate before coating and (b) coated with film (precursor solution) during the reference process.

The temperature of the film at the centre of the substrate in the  
10 preparation process (Fig. S1b right) is about 3°C lower than that  
of the substrate before the coating process (Fig. S1a right). This  
indicates the existence of the cooling effect; however it is  
difficult to quantify the amount of the absorbed water from these  
data. Considering the large latent heat of vaporization of the  
15 alcohols (equal to condensing 1.4  $\mu\text{m}$  of water if it is converted  
completely), it should be reasonable that the cooling effect is the  
cause of the water uptake.
